## RESEARCH ARTICLE

# Emersion behaviour underlies variation in gill morphology and aquatic respiratory function in the amphibious fish *Kryptolebias marmoratus*

A. J. Turko<sup>1,\*</sup>, A. Tatarenkov<sup>2</sup>, S. Currie<sup>3</sup>, R. L. Earley<sup>4</sup>, A. Platek<sup>1</sup>, D. S. Taylor<sup>5</sup> and P. A. Wright<sup>1</sup>

**ABSTRACT**

Fishes acclimated to hypoxic environments often increase gill surface area to improve O<sub>2</sub> uptake. In some species, surface area is increased via reduction of an interlamellar cell mass (ILCM) that fills water channels between gill lamellae. Amphibious fishes, however, may not increase gill surface area in hypoxic water because these species can, instead, leave water and breathe air. To differentiate between these possibilities, we compared wild amphibious mangrove rivulus *Kryptolebias marmoratus* from two habitats that varied in O<sub>2</sub> availability – a hypoxic freshwater pool versus nearly anoxic crab burrows. Fish captured from crab burrows had less gill surface area (as ILCMs were enlarged by ~32%), increased rates of normoxic O<sub>2</sub> consumption and increased critical O<sub>2</sub> tension compared with fish from the freshwater pool. Thus, wild mangrove rivulus do not respond to near-anoxic water by decreasing metabolism or increasing O<sub>2</sub> extraction. Instead, fish from the crab burrow habitat spent three times longer out of water, which probably caused the observed changes in gill morphology and respiratory phenotype. We also tested whether critical O<sub>2</sub> tension is influenced by genetic heterozygosity, as *K. marmoratus* is one of only two hermaphroditic vertebrate species that can produce both self-fertilized (inbred) or out-crossed (more heterozygous) offspring. We found no evidence for inbreeding depression, suggesting that self-fertilization does not impair respiratory function. Overall, our results demonstrate that amphibious fishes that inhabit hypoxic aquatic habitats can use a fundamentally different strategy from that used by fully aquatic water-breathing fishes, relying on escape behaviour rather than metabolic depression or increased O<sub>2</sub> extraction ability.

**KEY WORDS:** Interlamellar cell mass, Metabolic rate, Critical oxygen tension, Trade-offs, Inbreeding depression

**INTRODUCTION**

Oxygen availability in aquatic systems is often spatially and temporally variable (Crispo and Chapman, 2008; Diaz and Rosenberg, 2008). To match metabolic O<sub>2</sub> demands to low O<sub>2</sub> supply in hypoxic conditions, fishes use a variety of behavioural, physiological and morphological adjustments to reduce O<sub>2</sub>

requirements and increase O<sub>2</sub> uptake from the water (Richards et al., 2009). For example, fishes may swim away from hypoxic areas or use aquatic surface respiration to ventilate the gills with relatively oxygenated water from the air-water interface (Kramer and McClure, 1982; Chapman and McKenzie, 2009). These behaviours are often complemented by physiological and morphological strategies to increase the capacity for O<sub>2</sub> uptake at the gills (Sollid and Nilsson, 2006; Richards, 2009). Fishes can maximize both functional surface area (the gill area that is perfused with blood), by increasing blood flow, and the total surface area (the maximum gill area that can be perfused), via growth of gill filaments or lamellae (Timmerman and Chapman, 2004; Chapman et al., 2008; Blank and Burggren, 2014). In some species, the total gill surface area can also be increased by reversibly decreasing the size of the interlamellar cell mass (ILCM) – epithelial tissue that fills the water channels between gill lamellae (reviewed in Sollid and Nilsson, 2006; Nilsson, 2007; Nilsson et al., 2012).

Fishes have repeatedly evolved amphibious lifestyles in response to hypoxic aquatic environments (Graham, 1997; Graham and Lee, 2004; Wright and Turko, 2016). Amphibious fishes often respond to severe aquatic hypoxia by leaving the water (emersion) and breathing atmospheric air using extra-branchial air-breathing organs (e.g. Mandic et al., 2009a; Urbina et al., 2011; Regan et al., 2011). In these species, large gill surface areas may thus be unnecessary for maintaining aquatic O<sub>2</sub> uptake, and long gill filaments and lamella may be susceptible to damage or cause increased rates of evaporative water loss during emersion (Nilsson et al., 2012; Wright, 2012). To support the gills during emersion, some amphibious fishes have evolved specialized gill structures (Munshi, 1976). For example, several mudskippers possess stout filaments and lamellae (Low et al., 1988), and the lungfish *Protopterus annectens* has well-separated lamellae that are reversibly covered with mucus during terrestrial aestivation (Sturla et al., 2002). In the amphibious mangrove rivulus *Kryptolebias marmoratus* (Poey 1880), gill arches are reversibly stiffened after 7 days of terrestrial acclimation (Turko et al., 2017). Gill remodelling via enlargement of an ILCM also occurs in *K. marmoratus* out of water (Ong et al., 2007), which may minimize evaporative water loss or provide support for the lamellae, but also reduces total surface area and impairs O<sub>2</sub> uptake when fish return to water (Turko et al., 2012). Thus, total gill surface area in amphibious fishes may be subject to a trade-off in which adequate surface area for aquatic respiration is balanced against the benefits of small gills while out of water.

Our goal was to understand how the environment influences gill remodelling and aquatic respiration of amphibious fishes by comparing wild populations of *K. marmoratus* from habitats with contrasting O<sub>2</sub> availability. Mangrove rivulus are euryhaline, amphibious killifish that inhabit small ponds and crab burrows

<sup>1</sup>Department of Integrative Biology, University of Guelph, Guelph, Ontario, Canada N1G 2W1. <sup>2</sup>Department of Ecology and Evolutionary Biology, University of California, Irvine, Irvine, CA 92697, USA. <sup>3</sup>Department of Biology, Mount Allison University, Sackville, New Brunswick, Canada E4L 1E2. <sup>4</sup>Department of Biological Sciences, University of Alabama, Tuscaloosa, AL 35487, USA. <sup>5</sup>Brevard County Environmentally Endangered Lands Program, Melbourne, FL 32904, USA.

\*Author for correspondence (aturko@uoguelph.ca)

 A.J.T., 0000-0002-6330-5798; A.T., 0000-0002-0516-5862

throughout mangrove swamps of the tropical western Atlantic (Taylor, 2012; Tatarenkov et al., 2017). These habitats are often hypoxic and high in hydrogen sulphide and, like several other amphibious fishes, mangrove rivulus avoid these stressors by leaving water and breathing through their skin (Taylor, 2012; Wright, 2012; Turko and Wright, 2015). In Belize, we found a population of mangrove rivulus living in a hypoxic ( $P_{O_2} \sim 3.2$  kPa) freshwater pool and other fish inhabiting nearly anoxic ( $\sim 0.8$  kPa) seawater crab burrows. If the nearly anoxic conditions in the crab burrow habitat causes mangrove rivulus to leave water and breathe air, these fish should have higher rates of emersion, reduced gill surface area (ILCM enlargement) and reduced capacity for aquatic gas exchange. To evaluate these predictions, we measured the critical  $O_2$  tension ( $P_{crit}$ ; an indicator of respiratory function), gill morphology and emersion rates in fish from both habitats.

In addition to environmental influences on respiratory function via gill remodelling, intraspecific genetic differences may also influence respiratory performance. Specifically, heterozygous individuals have been hypothesized to be able to mount a more robust response to environmental challenges than inbred, homozygous individuals (a phenomenon known as inbreeding depression; Shull, 1948; Samollow and Soulé, 1983; Shikano and Taniguchi, 2002; Reed and Frankham, 2003). Considering that respiratory function is determined by complex cellular and whole-animal traits involving hundreds of genes, the effects of inbreeding depression may be particularly pronounced (Gracey et al., 2001; Ton et al., 2003; van der Meer et al., 2005; Mandic et al., 2014). However, there are few direct tests of the heterozygote advantage hypothesis in vertebrates, and a meta-analysis of the empirical data suggests that inbreeding effects may be minimal (Chapman et al., 2009). As one of only two known self-fertilizing hermaphroditic vertebrates (Harrington, 1961; Tatarenkov et al., 2009; Avise and Tatarenkov, 2015), *K. marmoratus* are an excellent model for investigating whether inbreeding reduces respiratory function. In the wild, *K. marmoratus* hermaphrodites coexist with a smaller number of males, resulting in distinct populations including almost completely homozygous and also largely heterozygous individuals (Mackiewicz et al., 2006a; Turner et al., 2006; Ellison et al., 2011; Tatarenkov et al., 2015). Our second objective was, thus, to determine whether natural variation in heterozygosity (estimated using 32 microsatellite loci) influenced respiratory function (approximated as  $P_{crit}$ ) in wild fish.

## MATERIALS AND METHODS

### Collection of information

In December 2012, mangrove rivulus were collected on Long Caye, Lighthouse Reef Atoll, Belize, from three sites within 500 m of each other: a freshwater pond, a cluster of crab burrows and a small pool by the former Calypso resort (Fig. S1). Fish from the freshwater pond and crab burrow sites were compared to determine how the environment influences gill morphology, respiratory function and emersion behaviour, as these two sites differed greatly in abiotic conditions (Table 1). The Calypso site is a designated 'no take' site for long-term monitoring of population genetics in mangrove

rivulus (R.L.E., D.S.T., A.T., in preparation) and, so, fish from this site were only briefly taken for determination of respiratory function and heterozygosity (fin clips) before being released. Gee minnow traps were used to capture fish in open ponds, and Taylor cup traps were used to sample crab burrows (Davis et al., 2003; Taylor, 1990). Fish were kept in plastic Whirl-Pak bags (60 ml) in water from their respective habitats for up to 48 h before experiments. All experiments were approved by the University of Guelph animal care committee.

Water conditions at each site (temperature, salinity, pH, dissolved  $O_2$ ) were measured using an electronic field probe (HI 9828, Hanna Instruments, Woonsocket, RI, USA). Aquatic conditions within crab burrows were taken from the same 18 burrows four times over 7 days between 10:00 and 15:00 h. Measurements of the freshwater and Calypso pools were taken at the same location five to six times between 09:00 and 21:00 h, over the span of 8 days. The crab burrow sampling site was located in a dense forest of red mangrove trees (*Rhizophora mangle*) on the west side of Long Caye, where numerous land crab (*Cardisoma guanhumii*) burrows were found (Fig. S1). Water in the crab burrows ranged in salinity from brackish to full-strength seawater and was severely hypoxic or anoxic throughout the day (Table 1; Fig. S2). The freshwater pond site contained abundant *K. marmoratus* and was a shallow (<50 cm depth,  $\sim 200$  m<sup>2</sup>) open pool with plentiful green algae on the northeastern part of Long Caye. The pool contained freshwater (0.3‰) and was moderately hypoxic, with partial pressures of  $O_2$  that ranged from 1.2 kPa in the morning to 4.5 kPa by late afternoon (Table 1; Fig. S2). Among the many *K. marmoratus* field collection sites described from western Atlantic mangroves, this location is the first known completely freshwater habitat reported for this species (Taylor, 2012). Although it is known that mangrove rivulus can survive in freshwater for several weeks (LeBlanc et al., 2010), to our knowledge, no other field site has exhibited such low salinity.

### Respiration and critical $O_2$ tension

Aquatic  $O_2$  consumption of size-matched fish (Table 2) was measured using closed glass respirometry chambers ( $\sim 50$  ml, 28°C), as described previously (Rodela and Wright, 2006; Turko et al., 2012). Briefly, dissolved  $O_2$  (DO) was continually monitored using Clark-type electrodes (Vernier DO-BTA and LabPro, Vernier Software and Technology, Beaverton, OR, USA) connected to a computer running Vernier LoggerPro 3.8 software. Fish were acclimated to the respirometry chambers for 30 min, as preliminary experiments indicated that 30 min was sufficient to allow metabolic rates to stabilize. Chambers were then sealed and  $O_2$  consumption was recorded over a 2–4 h period until DO dropped below 2% of saturation. Background  $O_2$  consumption was measured in chambers without fish for approximately 1 h immediately after each experiment and this value was subtracted from the  $O_2$  consumption values of the fish. Oxygen consumption of freshwater fish ( $n=11$ ) was measured in well-aerated water obtained from the pond where they were captured. Fish collected from crab burrows ( $n=10$ ) and the Calypso site ( $n=11$ ) were tested in relatively clean, well-aerated seawater (34‰). High background rates of  $O_2$  consumption in crab

**Table 1. Aquatic parameters of Long Caye field sites**

| Site            | GPS coordinates        | $P_{O_2}$ (kPa)       | Salinity (‰)          | Temperature (°C)      | pH                    |
|-----------------|------------------------|-----------------------|-----------------------|-----------------------|-----------------------|
| Freshwater pond | 17°13.24'N, 87°35.53'W | 3.23±0.61 (1.23–4.47) | 0.33±0.02 (0.24–0.37) | 26.0±0.60 (24.6–28.0) | 7.60±0.25 (7.15–8.42) |
| Crab burrows    | 17°13.08'N, 87°35.65'W | 0.29±0.13 (0–1.95)    | 28.1±0.7 (24.0–33.8)  | 26.4±0.1 (25.6–27.3)  | 6.77±0.05 (6.44–7.19) |
| Calypso pool    | 17°13.17'N, 87°35.45'W | 2.14±0.17 (1.5–2.7)   | 22.3±1.3 (19.8–28.3)  | 30.5±0.6 (28.5–32.2)  | 7.52±0.23 (6.89–8.34) |

Data are presented as means±s.e.m. of 4–6 measurements per site; ranges are given in parentheses.

**Table 2. Body size and condition of *Kryptolebias marmoratus* used for behaviour and respiratory function experiments**

| Site            | Standard length (mm) | Mass (g)  | Condition (Fulton's K) |
|-----------------|----------------------|-----------|------------------------|
| Freshwater pond | 37.5±1.1             | 0.83±0.07 | 1.53±0.02              |
| Crab burrows    | 39.1±1.5             | 0.77±0.10 | 1.25±0.04*             |

Data are presented as means±s.e.m.; the asterisk denotes a significant difference between locations (*t*-test,  $P < 0.05$ ).

burrow and Calypso pond water due to large amounts of organic matter would have prevented accurate measurements of metabolic rate. Immediately after each trial, fish were killed (using 500 mg l<sup>-1</sup> tricaine methanesulphonate buffered to neutral with sodium bicarbonate) and a fin clip was taken for determination of heterozygosity (see below).

Critical O<sub>2</sub> tension ( $P_{crit}$ ) was calculated from the O<sub>2</sub> consumption curves using two methods: broken-stick regression (BSR; Yeager and Ultsch, 1989) and nonlinear regression (NLR; Marshall et al., 2013). The traditional BSR approach estimates  $P_{crit}$  as the intersection of the two linear regression lines that best fit the  $P_{O_2}$  versus O<sub>2</sub> consumption plot. BSR estimates of  $P_{crit}$  were calculated using REGRESS, Jeffrey Munday's software ([www.wfu.edu/~munday/software/o2.exe](http://www.wfu.edu/~munday/software/o2.exe)), which uses the algorithm described in Yeager and Ultsch (1989). The newer NLR technique was designed to calculate  $P_{crit}$  in cases when the transition between O<sub>2</sub> regulation and O<sub>2</sub> conformation is not a clear break-point; instead of using linear regression, this method estimates  $P_{crit}$  from the best nonlinear function that describes the  $P_{O_2}$  versus O<sub>2</sub> consumption relationship (Marshall et al., 2013). Briefly, six separate curves (Michaelis–Menten, power, hyperbola, Pareto and Weibull with or without an intercept) were fitted to a normalized O<sub>2</sub> consumption curve for each fish, and the curve with the lowest corrected Akaike's information criterion (AICc) score was chosen.  $P_{crit}$  was then calculated (slope  $m=0.065$ ) from the derivative of the chosen function using the equations in Marshall et al. (2013) or using Maple software (Maplesoft, Waterloo, ON, Canada) to solve Weibull functions.

The regulation index (RI) is a complementary measure to  $P_{crit}$  that describes the extent to which an organism regulates O<sub>2</sub> uptake at low environmental  $P_{O_2}$  (Mueller and Seymour, 2011). The RI is calculated from the same O<sub>2</sub> consumption versus  $P_{O_2}$  trace used to calculate  $P_{crit}$ , and represents the relative area under the curve but above the line of equality. Thus, a perfect oxyconformer has an RI value of zero (i.e. O<sub>2</sub> consumption matches  $P_{O_2}$ ), whereas a hypothetically perfect O<sub>2</sub> regulator maintains O<sub>2</sub> consumption even in near-anoxic conditions (RI=1).

### Gill morphology

Tissue samples were taken immediately from fish collected from both saltwater crab burrows and the freshwater pond. To determine whether the gill morphology of wild-caught fish was phenotypically plastic, additional fish from each of these habitats ( $n=3-11$ ) were acclimated to a terrestrial environment for 7 or 13 days before being killed. Fish were kept out of water on moist filter paper above a cotton ball reservoir soaked with either seawater (crab burrow fish) or freshwater (freshwater pond fish), as described previously (Ong et al., 2007). Whole heads were fixed in 10% buffered formalin for 24 h, decalcified (Surgipath Decalcifier II, Winnipeg, MB, Canada) for 1 h, and then transferred to 70% ethanol for storage and shipment to Guelph, ON, Canada. Tissues were routinely paraffin embedded, sectioned in 5 µm increments, and stained with haematoxylin and eosin. Photomicrographs were taken using a

Nikon Eclipse 90i microscope and measurements were made using ImageJ software (National Institutes of Health, Bethesda, MD, USA). Five gill lamellae per arch were randomly selected, and the length of each lamella and size of the adjacent ILCM was measured (Ong et al., 2007; LeBlanc et al., 2010).

### Emersion behaviour

Emersion rates were quantified for individual fish by measuring the proportion of time each individual spent stuck to the side of the holding container above the water (Turko et al., 2011). Fish collected from either crab burrows ( $n=10$ ) or the freshwater pond ( $n=10$ ) were placed in translucent 100 ml plastic containers (FisherBrand Collection Containers; Fisher Scientific) containing 60 ml well-aerated water obtained from the collection site. After a 1 h acclimation period, fish were video recorded (Logitech Quickcam Pro, Fremont, CA, USA) for an additional 1 h period. Each container was surrounded by white paper on three sides to prevent fish from observing each other, and care was taken not to disturb the fish for the duration of the acclimation and recording period. The video files were subsequently used to quantify the duration of each emersion event to the nearest minute.

### Heterozygosity and genetic relationships

Experimental fish were either killed (freshwater pond and crab burrow sites) or lightly anaesthetized (Calypso collection site) with 500 mg l<sup>-1</sup> tricaine methanesulphonate buffered to neutral with sodium bicarbonate, and a small (~1 mm<sup>2</sup>) piece of caudal fin was collected using an ethanol-cleaned razorblade. Fin clips were immediately stored in DNA preservative (0.25 mol l<sup>-1</sup> ethylenediaminetetraacetic acid, 20% dimethyl sulphoxide, NaCl saturated, pH 7.5) for transport to the University of California, Irvine (Irvine, CA, USA). Besides genotyping fish used in the respiration experiments, we sampled and genotyped fin clips from additional fish in the same locations. The combined samples (i.e. including experimental and non-experimental) were as follows: freshwater pond ( $n=82$ ), crab burrows site ( $n=46$ ) and Calypso pond ( $n=50$ ). These large sample sizes allowed us to evaluate how well experimental fish represented the genetic diversity in our field site. Genetic relatedness and heterozygosity were estimated with 32 nuclear microsatellite loci developed previously for *K. marmoratus* (Mackiewicz et al., 2006b). DNA preparations, the genotyping protocol and the binning of alleles followed Tarenkov et al. (2010, 2012). Individual heterozygosity was calculated by summing the number of heterozygous loci in an individual and dividing the sum by the total number of loci. The number of heterozygous loci for each individual was counted using Microsatellite Analyser v. 4.05 (Dieringer and Schlötterer, 2003). Note that the average of individual heterozygosities corresponds to the observed heterozygosity ( $H_O$ ) of a population. Genetic differences between individuals were estimated with the distance metric based on the proportion of shared alleles ( $D_{PS}$ ; Bowcock et al., 1994). Values of  $D_{PS}$  can range from zero (genetically identical) to one (no shared alleles). Calculations of  $D_{PS}$  were done using Microsatellite Analyser. The genetic relationships among individuals were summarized with the neighbour-joining (NJ) trees constructed in PHYLIP software ver. 3.695 (Felsenstein, 1993).

### Statistical analysis

We compared  $P_{crit}$ , RI and emersion behaviour between the crab burrow and freshwater populations of *K. marmoratus* using Student's *t*-tests to understand the effect of the environment on these traits. Two-way repeated measures ANOVA and *post hoc*

Holm–Šidák tests were used to compare rates of  $O_2$  consumption between habitats and across environmental  $P_{O_2}$ , and two-way ANOVA was used to compare coverage of the gill lamellae between crab burrow and freshwater pond fish directly from the field and after 7 or 13 days of air exposure.

To determine whether homozygosity influenced respiratory function, we used fish collected from all three sites. We first performed simple linear regression analyses with either BSR or NLR estimates of  $P_{crit}$  as the dependent variable and individual heterozygosities as the independent variable. To account for any possible influence of phylogenetic autocorrelation on our results, we also analysed the data using the phylogenetic generalized least squares (pgls) function in the R package caper (<https://cran.r-project.org/web/packages/caper/caper.pdf>). These analyses were performed using both NJ and unweighted pair group method with arithmetic mean (UPGMA) phylogenies that were built using the 32 microsatellite markers with a Brownian model for evolution at  $\lambda$  values (importance of branch lengths) of 0, 1 or the ‘maximum likelihood’ value calculated by caper.

RStudio (<https://www.rstudio.com/>) was used to perform the pgls analysis, and SigmaPlot 11 (Systat Software, San Jose, CA, USA) was used for all other analyses (critical  $\alpha=0.05$ ). Throughout the text, values are given as means $\pm$ s.e.m.

## RESULTS

### Respiration and gill morphology

In normoxic water, the rate of  $O_2$  consumption by mangrove rivulus from the freshwater pond was significantly lower than in fish collected in crab burrows, and this difference persisted at all values of  $P_{O_2}$  above 6 kPa (two-way repeated measures ANOVA interaction,  $F_{1,18}=7.633$ ,  $P<0.001$ ; Fig. 1A). Fish from the freshwater pond had significantly lower  $P_{crit}$  values than those of crab burrow fish, although the magnitude of this effect varied, depending on the technique used to estimate the break-point of the  $O_2$  consumption curve. Using the traditional BSR approach, the  $P_{crit}$  of crab burrow fish was  $\sim 60\%$  higher than that of freshwater pond

fish ( $t_{19}=3.220$ ,  $P=0.005$ ; Fig. 1B), but using NLR calculations the  $P_{crit}$  of crab burrow fish was only  $\sim 30\%$  higher than that of freshwater pond fish ( $t_{19}=2.338$ ,  $P=0.030$ ; Fig. 1B). Estimates of  $P_{crit}$  using BSR and NLR were significantly correlated (linear regression,  $R^2=0.216$ ,  $F_{1,31}=8.522$ ,  $P=0.006$ ) but differed by an average of  $2.55\pm 0.30$  kPa and by as much as 5.98 kPa (Fig. S3). There was no difference in the RI between fish collected at different locations ( $t_{19}=1.333$ ,  $P=0.20$ ; Fig. 1C).

We observed a significant interaction between habitat and acclimation (two-way ANOVA interaction,  $F_{2,41}=3.957$ ,  $P=0.027$ ; Fig. 2) on gill coverage by the ILCM. Fish sampled immediately after capture from crab burrows had significantly more of the interlamellar space covered by an ILCM than fish from the freshwater pond ( $t=2.786$ ,  $P=0.008$ ). After 7 days of air exposure, the ILCM had significantly enlarged in both the crab burrow ( $t=2.476$ ,  $P=0.018$ ) and freshwater pond fish ( $t=8.153$ ,  $P<0.001$ ; Fig. 2C). The ILCM did not enlarge further after an additional 6 days in air in either group ( $t\leq 1.22$ ,  $P>0.2$ ; Fig. 2E). There was no difference in ILCM coverage between freshwater and crab burrow fish after 7 days ( $t=1.223$ ,  $P=0.23$ ) or 13 days ( $t=0.225$ ,  $P=0.82$ ) of terrestrial acclimation.

Fish collected from crab burrows spent almost 90% of the recording period out of water, significantly more than freshwater pond fish, which emerged  $\sim 30\%$  of the time ( $t_{18}=3.896$ ,  $P=0.001$ ; Fig. 3).

### Heterozygosity and respiratory function

Phylogenies using both UPGMA and NJ methods revealed a similar population structure among mangrove rivulus on Long Caye. NJ trees summarizing genetic similarity (and, therefore, relatedness) among fish are shown in Fig. 4A (for experimental animals) and Fig. S4 (for all fish). Both trees illustrate high genetic diversity, evidenced by long branches, although some fish are genetically identical. There were two major lineages of fish present in the freshwater pond (Fig. 4A). Fish within each of these lineages were highly genetically similar. In one freshwater lineage, 37 fish

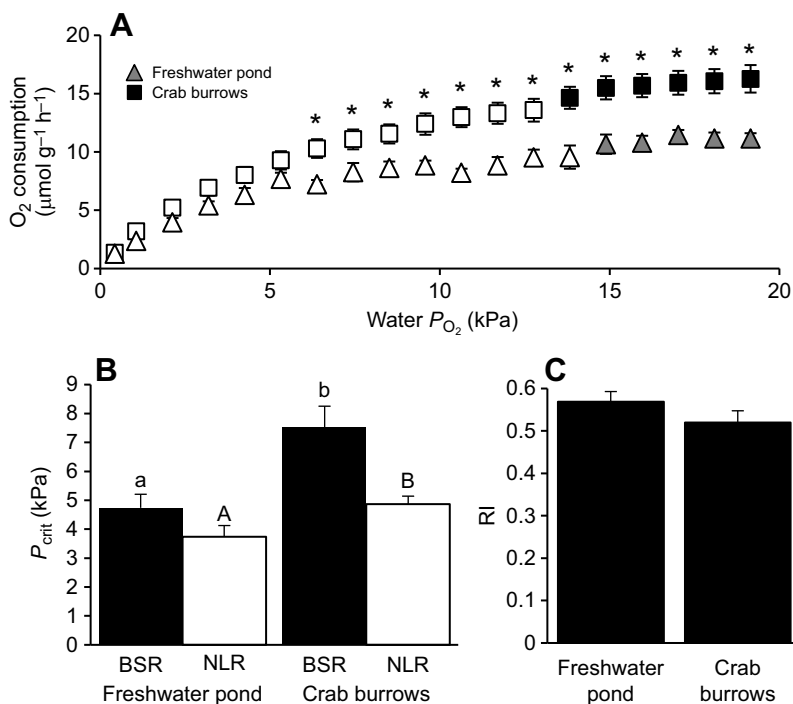

**Fig. 1. Respiratory measurements of *Kryptolebias marmoratus* from two sites on Long Caye.** (A) Oxygen consumption curves from critical  $O_2$  tension ( $P_{crit}$ ) trials. Asterisks above symbols denote significant differences in the rate of  $O_2$  consumption at a given  $P_{O_2}$  between collection locations, and open symbols denote significantly different rates of  $O_2$  consumption within a population compared with the normoxic rate at 19 kPa (two-way ANOVA, interaction  $P<0.05$ ). (B) Calculated values of  $P_{crit}$  using linear broken-stick regression (BSR) or nonlinear regression (NLR), and (C) regulation index (RI), a relative measure of whether an animal is an  $O_2$  conformer or  $O_2$  regulator. Different letters above bars denote significant differences in  $P_{crit}$  between locations (lowercase letters, comparison of BSR-calculated values; uppercase letters, comparison of NLR-calculated values;  $t$ -test,  $P<0.05$ ). Freshwater pond,  $n=11$ ; crab burrow,  $n=10$ . Error bars represent  $\pm$ s.e.m.

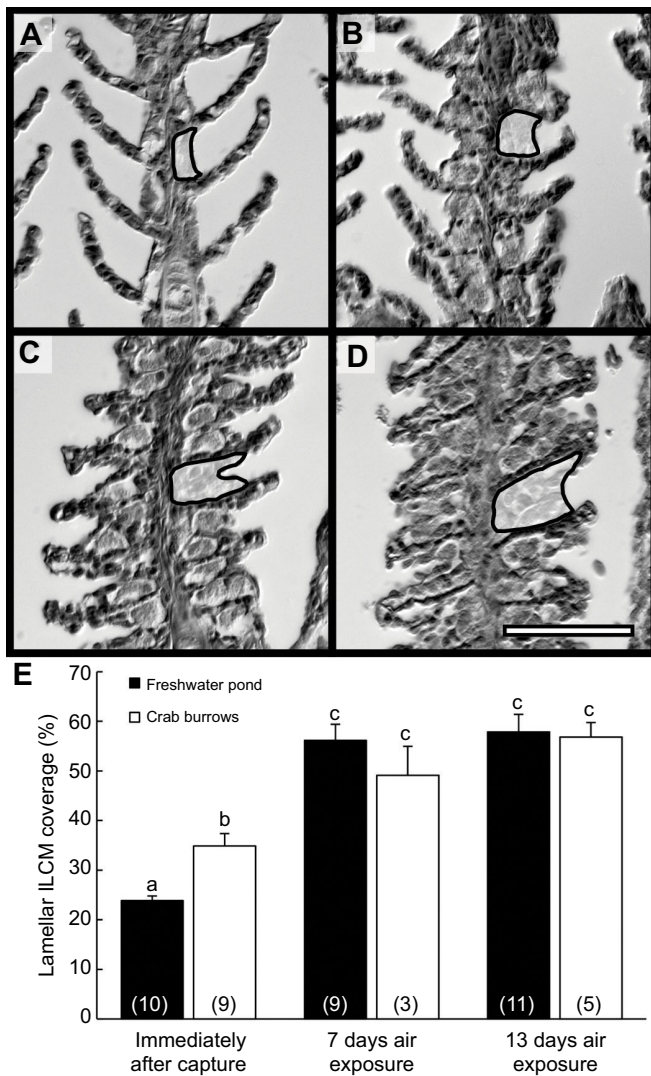

**Fig. 2. Gill morphology of *K. marmoratus* from Long Caye.** Representative photographs of gills from fish taken immediately after capture from (A) a freshwater pond or (B) crab burrows. Terrestrial acclimation induced gill remodelling in fish from both (C) the freshwater pond and (D) crab burrows. An example of an interlamellar cell mass (ILCM) in each panel is outlined in black. Scale bar: 50  $\mu$ m. (E) ILCM coverage of gill lamellae in fish collected directly from the wild or terrestrially acclimated after capture. Different letters above bars denote significant differences between groups (two-way ANOVA, interaction  $P < 0.05$ ). Sample sizes are given in brackets at the base of each bar. Error bars represent  $\pm$ s.e.m.

were identical at all 32 loci examined, and another seven fish were distinct at one locus only. There was slightly more genetic diversity in the other freshwater lineage, although they were nonetheless highly similar, being distinct from each other at no more than three of the 32 loci examined. Notably, divergence between the two freshwater lineages (determined by  $D_{PS}$ ) is of the same order as the divergence between any random pair of fish captured in crab burrows or the Calypso pool. The crab burrow and Calypso fish effectively form a genetic mosaic with almost no indication of geographic pattern. These fish were far less homozygous (at  $77.8 \pm 0.05\%$  of microsatellite loci) than freshwater fish (homozygous at  $100 \pm 0\%$  of microsatellite loci;  $t_{30} = 3.232$ ,  $P = 0.003$ ). Fig. S4 further demonstrates that our experimental fish represent an unbiased sample of the genetic diversity in the study sites; indeed,

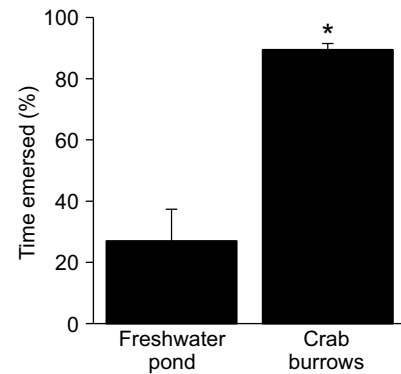

**Fig. 3. Emersion behaviour of *K. marmoratus* from Long Caye.** Proportion of time fish spent stuck to the side of a plastic sample container above the water. The asterisk denotes a significant difference between sites ( $t$ -test,  $P = 0.001$ ). Freshwater pond,  $n = 10$ ; crab burrow,  $n = 10$ . Error bars represent  $\pm$ s.e.m.

experimental fish are randomly and evenly scattered among branches of the full genetic tree. Furthermore, the lack of geographic clustering suggests that the physiological patterns described above are not due to idiosyncrasies of particular genetic lineages, but are the result of the environmental conditions in which fish were collected. However, the high degree of relatedness between some individuals within the freshwater pond site suggests that, when working with self-fertilizing hermaphroditic species, it is possible to take a series of replicate measurements on individuals of the same genotype inadvertently. Thus, caution must be exercised when interpreting results.

Heterozygosity did not significantly explain the variation in  $P_{crit}$  calculated using either BSR or NLR, when tested with simple linear regressions (BSR,  $R^2 = 0.015$ ,  $F_{1,30} = 0.458$ ,  $P = 0.50$ ; NLR,  $R^2 = 0.007$ ,  $F_{1,30} = 0.235$ ,  $P = 0.63$ ; Fig. 4B). Phylogenetically corrected statistical models similarly found no relationship between heterozygosity and either measure of  $P_{crit}$  (all  $R^2 \leq 0.10$ , all  $P > 0.05$ ; Table 3).

## DISCUSSION

Water-breathing fishes that live in hypoxic habitats are typically characterized by low rates of  $O_2$  consumption and large gill surface areas, which, in turn, reduce  $P_{crit}$  and allow the maintenance of routine aerobic metabolism at low environmental  $P_{O_2}$  (Mandic et al.,

**Table 3. Statistical results from phylogenetically controlled analysis of correlations between degree of heterozygosity and respiratory function**

| Phylogeny | $P_{crit}$ calculation | $\lambda$  | $F$ statistic | $R^2$ | $P$  |
|-----------|------------------------|------------|---------------|-------|------|
| NJ        | BSR                    | ML (=0)    | 0.53          | 0.02  | 0.47 |
| NJ        | BSR                    | 1          | 3.31          | 0.10  | 0.08 |
| NJ        | NLR                    | ML (=0)    | 0.27          | 0.01  | 0.61 |
| NJ        | NLR                    | 1          | 1.11          | 0.04  | 0.30 |
| UPGMA     | BSR                    | ML (=0.15) | 0.02          | 0.001 | 0.89 |
| UPGMA     | BSR                    | 0          | 0.46          | 0.02  | 0.50 |
| UPGMA     | BSR                    | 1          | 1.33          | 0.04  | 0.26 |
| UPGMA     | NLR                    | ML (=0.02) | 0.13          | 0.004 | 0.72 |
| UPGMA     | NLR                    | 0          | 0.24          | 0.01  | 0.63 |
| UPGMA     | NLR                    | 1          | 3.16          | 0.10  | 0.09 |

Phylogenies were created using neighbour-joining (NJ) or unweighted pair group method with arithmetic mean (UPGMA) methods. Critical  $O_2$  tension ( $P_{crit}$ ) was calculated using broken-stick regression (BSR) or nonlinear regression (NLR) approaches. Values of  $\lambda$ , the importance of branch lengths, were set to 0, 1 or the calculated maximum likelihood (ML) value.

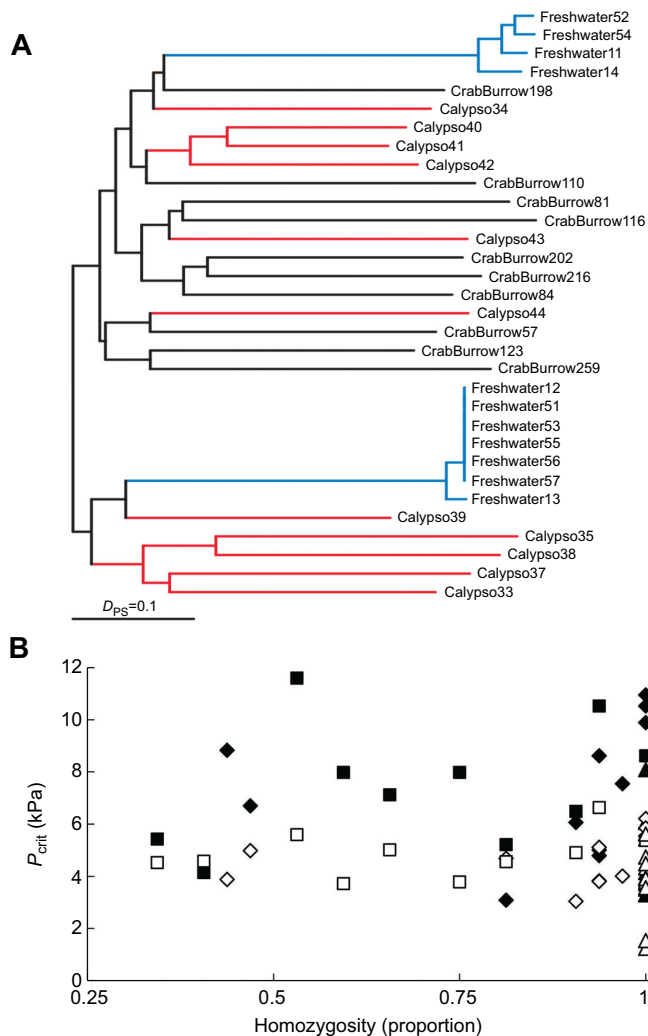

**Fig. 4. Genetic relationships between Long Caye *K. marmoratus* and consequences for respiratory function.** (A) Neighbour-joining tree of *K. marmoratus* sampled from three sites on Long Caye. Fish captured from crab burrows are labelled in black, fish from the freshwater pool are labelled in blue and fish from the brackish pool Calypso are labelled in red. (B) Heterozygosity did not significantly explain the respiratory function ( $P_{crit}$ ) calculated using broken-stick regression (black symbols,  $R^2=0.015$ ,  $P>0.05$ ) or nonlinear regression (open symbols,  $R^2=0.001$ ,  $P>0.05$ ). Square symbols represent fish from crab burrows, triangles represent those from the freshwater pool and diamonds represent those from Calypso.

2009b). In contrast, we found that wild *K. marmoratus* captured from nearly anoxic crab burrows had higher rates of  $O_2$  consumption, increased  $P_{crit}$  and reduced total gill surface area relative to fish in a less hypoxic freshwater pool. The probable explanation for these results is that amphibious *K. marmoratus* emerge far more frequently in poor water conditions, and air exposure is the dominant determinant of gill remodelling and metabolic status in this species. Finally, we found no evidence that  $P_{crit}$  was affected by high or complete homozygosity, indicating the absence of inbreeding depression in these environments.

### Gill remodelling

Gill remodelling is one mechanism used by some fully aquatic fishes to increase total gill surface area and improve  $O_2$  uptake in response to hypoxic environments (Sollid et al., 2003; Dhillon et al., 2013; Tzaneva et al., 2011, 2014). Similarly, mangrove rivulus

acclimated to aquatic hypoxia (4.2 kPa) for 7 days in the laboratory had significantly increased gill surface area (smaller ILCMs) compared with normoxic controls, but these fish were forcibly submerged for the duration of the acclimation period (Turko et al., 2012). In wild mangrove rivulus, however, we observed the opposite pattern – fish collected from nearly anoxic crab burrows had significantly enlarged ILCMs (reduced total gill surface area) compared with fish from the freshwater pool. Thus, in wild mangrove rivulus, it appears that the relationship between aquatic  $P_{O_2}$  and gill morphology is mediated by emersion behaviour, such that aquatic hypoxia ultimately results in mangrove rivulus with gills largely covered by an ILCM.

We found that mangrove rivulus captured from crab burrows spent almost 90% of their time out of water, triple the amount of time spent by fish from the freshwater pond. In the laboratory, gill remodelling in mangrove rivulus is caused both by prolonged acclimation (1 week) out of water (Ong et al., 2007; LeBlanc et al., 2010) and by frequent voluntary emersions interspersed with periods submerged in water (Turko et al., 2011). In two isogenic populations of laboratory fish (from Belize and the Bahamas), we previously quantified individual variation in emersion tendencies and found that some mangrove rivulus never left water, whereas others spent 78% of the week-long recording period out of water. The size of the ILCM in these fish was positively correlated with the amount of time each fish spent out of water, but this relationship disappeared after we prevented fish from emerging (with a mesh screen at the air–water interface) for a further week, strongly indicating that emersion behaviour causes enlargement of the ILCM (Turko et al., 2011). Therefore, we think that relatively high rates of emersion in mangrove rivulus from crab burrows versus those from the freshwater pond caused the differences in gill surface area we measured.

High rates of emersion in the crab burrow fish were probably stimulated by the nearly anoxic conditions in this habitat. In the laboratory, acute exposure to aquatic hypoxia induces emersion (Regan et al., 2011; Blewett et al., 2017) and, once the fish are out of water, respiration occurs across the skin (Grizzle and Thiyagarajah, 1987; Cooper et al., 2012) and bucco-opercular cavity (Turko et al., 2014). High concentrations of hydrogen sulphide (Abel et al., 1987) and  $CO_2$  (Robertson et al., 2015) have also been shown to induce emersion in mangrove rivulus. Given the stagnant conditions within the crab burrows, it is plausible that these gasses may have further contributed to the high rates of emersion we observed. In addition to our behavioural assay, we remotely video recorded a crab burrow and observed 11 instances of emersion by mangrove rivulus within 30 min (supplementary movie 1 in Turko and Wright, 2015). Taylor (2012) also reported frequent observations of emersed fish near crab burrows, suggesting that this behaviour is a regular occurrence in the field and not an artefact of the artificial plastic containers used for our behavioural experiments. Anecdotally, fish were never observed emersed at the freshwater pond site when water was present. However, we did not measure emersion behaviour or dissolved  $O_2$  in the freshwater pond at night, when algal respiration may have caused extreme hypoxia and possibly triggered emersion behaviour. If this occurred, presumably the fish did not spend enough time out of water to experience ILCM growth (Turko et al., 2011).

The functional benefits of ILCM enlargement during air exposure are unclear. One hypothesis is that the ILCM supports the lamellae, and prevents collapse and possible fusion of the epithelial tissue (Ong et al., 2007; Nilsson et al., 2012; Wright, 2012). Support of gill arches and filaments in terrestrially acclimated mangrove rivulus is also provided by collagen deposition (Turko et al., 2017),

but bony or cartilaginous tissues are not present in lamellae. Proliferation of the ILCM may thus provide an alternative structural mechanism in the absence of buoyant support from water. Alternatively, large ILCMs may reduce evaporative water loss across the gills (Wright, 2012). Considering that rates of buccopercular ventilation are low during air exposure (~5 ventilations per hour; Turko et al., 2014) and mangrove rivulus only survive in highly humid terrestrial habitats, it seems improbable that the primary role of the ILCM is water conservation.

### Respiratory function

Mangrove rivulus collected from nearly anoxic crab burrows had significantly higher  $P_{crit}$  and rates of  $O_2$  consumption (in normoxia) compared with fish collected from the freshwater pond. These differences are opposite to the typical pattern observed in fully aquatic fishes (e.g. Mandic et al., 2009b), and indicate that amphibious behaviour may shape these aspects of aquatic respiratory function. One possibility is that access to  $O_2$ -rich air during frequent emersions enables a larger 'metabolic engine' in crab burrow fish (e.g. faster growth, increased reproduction; Biro and Stamps, 2010), which causes the relatively high aquatic metabolic rates we observed. Increased  $O_2$  demand in these fish may also result from physiological costs associated with terrestrial acclimation, such as maintaining enlarged cutaneous ionocytes (LeBlanc et al., 2010). Crab burrow fish were also in significantly worse body condition (Fulton's  $K$ ) than freshwater pond fish, suggesting that differences in body composition or relative organ masses (e.g. gonads, liver) between the populations may also cause the observed difference in whole-animal metabolic rate (Boldsen et al., 2013). Alternatively, the worse body condition of crab burrow fish may reflect smaller energy reserves caused by the higher metabolic rate. Finally, the relatively high metabolic rate of crab burrow fish may have been caused by larger ionoregulatory demands in seawater than in freshwater. However, acclimation to water of different salinities did not change rates of  $O_2$  consumption in laboratory-reared mangrove rivulus (Turko et al., 2012).

Relatively high rates of normoxic  $O_2$  consumption in crab burrow fish occurred despite reduced gill surface area (enlarged ILCMs) in this population. This is not surprising, as respiratory gas transfer in fish at rest is thought to be perfusion limited and thus does not depend on gill surface area (Perry and Gilmour, 2002, 2010). At rest, only about 60% of the gill lamellae are perfused with blood in rainbow trout, *Oncorhynchus mykiss* (Booth, 1978). Furthermore, mangrove rivulus can maintain routine rates of  $O_2$  consumption with gill ventilatory frequency as low as five opercular movements per minute (Turko et al., 2012). Finally,  $O_2$  transfer across the skin may also contribute to total  $O_2$  uptake in mangrove rivulus under aquatic conditions (Grizzle and Thiyagarajah, 1987).

In moderately hypoxic water, fishes can maintain  $O_2$  uptake by increasing gill ventilation and perfusing more gill lamellae with blood but, under severe hypoxia, respiratory gas transfer becomes diffusion limited, and large total gill surface area becomes beneficial (Perry and Gilmour, 2002). The enlarged ILCMs of mangrove rivulus from crab burrows may thus impair  $O_2$  uptake under hypoxic aquatic conditions and increase  $P_{crit}$ , as has been demonstrated in *Carassius carassius* (Sollid et al., 2003) and *Fundulus heteroclitus* (McBryan et al., 2016). Similarly, enlarged ILCMs in laboratory-reared mangrove rivulus, induced with acclimation to either soft water or terrestrial conditions, were linked to higher  $P_{crit}$  than in control fish with small ILCMs (Turko et al., 2012). In these earlier experiments, there were no differences

in normoxic rates of  $O_2$  consumption between treatments. However, in the current study, crab burrow mangrove rivulus had higher normoxic  $O_2$  consumption rates than freshwater pond fish. It is, therefore, possible that the higher values of  $P_{crit}$  we measured in crab burrow fish simply resulted from higher overall  $O_2$  demand, and the enlarged ILCMs of these fish did not meaningfully impair branchial gas exchange. Consistent with this view, the rate of  $O_2$  consumption in crab burrow fish at any environmental  $P_{O_2}$  was never lower than that in freshwater pond fish, despite the difference in ILCM coverage. If enlarged ILCMs impaired branchial gas exchange, absolute rates of  $O_2$  uptake should have been lower in crab burrow fish under hypoxic conditions, all else being equal. One possibility is that compensatory responses help to maintain  $O_2$  uptake, such as increased haemoglobin concentrations and higher  $O_2$  binding affinity of haemoglobin (Turko et al., 2014). Ultimately, both increased  $O_2$  demand and enlarged ILCMs probably contributed to the increased  $P_{crit}$  of crab burrow mangrove rivulus. This was the case in a phylogenetically controlled study of sculpins, where large gill surface area, low metabolic rate and high haemoglobin affinity for  $O_2$  influenced  $P_{crit}$  (Mandic et al., 2009b).

### Plasticity versus genetic differences

Phenotypically plastic responses to emersion are one probable cause of the differences we observed between fish from crab burrows and those from the freshwater pond, but genetic differences between these sites could also be involved. In support of the plasticity hypothesis, we found that emersion behaviour in wild fish was correlated with ILCM size, and emersion behaviour drove plastic changes in gill morphology as described above (Turko et al., 2011). Furthermore, we found that both freshwater pond and crab burrow fish responded to 1 and 2 weeks of forced air exposure by increasing ILCM coverage to the same final magnitude. These data suggest that the two wild populations had similar scopes for plasticity in ILCM size, consistent with the hypothesis that the variation we observed in wild fish is due to plasticity. Finally, the freshwater pond fish comprised two distinct lineages, and emersion behaviour, metabolic rate,  $P_{crit}$  and gill morphology were similar in the two, as would be expected if phenotypic differences between them were the result of plasticity rather than of genetic divergence. However, it is premature to rule out the hypothesis that genetic differentiation between populations also contributed, as selection could have simply favoured similar phenotypes in each habitat (Stern and Orgogozo, 2009; Losos, 2011). Genetically based phenotypic differences are known to exist between other populations of *K. marmoratus* (Lin and Dunson, 1995), and cause differences in gill morphology in the closely related *F. heteroclitus* (McBryan et al., 2016). Common garden and/or reciprocal transplant experiments would be valuable to disentangle environmental and genetic effects.

### Self-fertilization and inbreeding depression

We were surprised to find that there was no relationship between heterozygosity and  $P_{crit}$  in wild *K. marmoratus*. As one of only two vertebrate species with a mixed-mating system that results in nearly homozygous (via self-fertilization) or heterozygous (mating with another individual) offspring, mangrove rivulus are an excellent model system for understanding the evolution of sexual reproduction (Harrington, 1961; Tatarenkov et al., 2009; Avise and Tatarenkov, 2015). Typically, heterozygous offspring are assumed to have higher fitness than that of inbred homozygotes (Stearns, 1987). However, guaranteed reproductive success from self-fertilization may outweigh the costs of inbreeding depression, especially when individual animals regularly colonize new habitats

(Baker, 1955; Pannell and Barrett, 1998; Avise and Tatarenkov, 2012). We found no evidence of inbreeding depression with respect to  $P_{crit}$ , suggesting that multiple generations of selfing and subsequent selection may have purged deleterious alleles from mangrove rivulus populations (Dolgin et al., 2007; Gimond et al., 2013). Our ability to detect an inbreeding effect may have been restricted by limited statistical power, considering the relatively small sample size ( $n=32$ ) but, because there was no hint of a relationship between heterozygosity and either measure of  $P_{crit}$  in our data ( $R^2<0.02$ ;  $P>0.5$ ), we do not think that this is the case. Thus, self-fertilization may allow single mangrove rivulus to colonize unoccupied and diverse habitats within the mangrove forest without paying a respiratory penalty.

Respiratory function in hypoxia is determined by complex phenotypic traits spanning the respiratory cascade (Gracey et al., 2001; Mandic et al., 2014). One might, therefore, expect that heterozygosity provides a greater diversity of alleles that could, in turn, enhance respiratory function, but this was not the case in our study. Consistent with our results, homozygosity did not impair developmental stability in nine populations of mangrove rivulus (Taylor, 2001). However, more heterozygous *K. marmoratus* have lower parasite loads, suggesting a cost to inbreeding in some circumstances (Ellison et al., 2011). Resistance to parasites is conferred by only a small set of major histocompatibility complex genes (Ellison et al., 2012). In contrast, the complexity of the respiratory system may protect against inbreeding (Wagner, 2005; Joyner, 2013). For example, mangrove rivulus can modify gill surface area (Ong et al., 2007), gill ventilation (Turko et al., 2012), blood flow (Cooper et al., 2012), haemoglobin concentration and binding affinity (Turko et al., 2014), and/or  $O_2$  delivery (Brunt et al., 2016). Modifications at one or several of these steps of the  $O_2$  transport cascade may be able to compensate for deleterious effects of inbreeding (if they are present) at any of the other levels (Richards et al., 2009). Furthermore, even highly inbred fish (as estimated using microsatellites or known from the pedigree of the laboratory lineages) are not completely homozygous when the whole genome is considered. For example, Lins et al. (2018) showed that genomes of inbred *K. marmoratus* lineages harbour 0.031–0.055% heterozygous sites, which amounts to tens of thousands of single nucleotide polymorphisms. At least some of this heterozygosity may be physiologically important and preserved by natural selection.

### Significance

Understanding how animals interact with their environment is crucial for explaining patterns of physiological acclimatization and adaptation. In wild mangrove rivulus, we found that animals from nearly anoxic, saline crab burrows had higher rates of  $O_2$  consumption, increased  $P_{crit}$  and less gill surface area than those from a moderately hypoxic freshwater pond, the opposite pattern to that generally observed in fully aquatic fishes. Instead, mangrove rivulus that inhabit crab burrows are probably highly amphibious and use the hypoxic burrow water only as a short-term refuge in response to disturbance. This largely amphibious habit may, in turn, cause gill remodelling and high metabolic rates, which then prevent these fish from maintaining routine rates of  $O_2$  consumption in hypoxic conditions (increased  $P_{crit}$ ). Aquatic hypoxia has been hypothesized to be an important factor promoting the evolution of terrestriality both in early tetrapods and in extant amphibious fishes (Graham, 1997). Our results provide further evidence for this hypothesis by suggesting that hypoxic aquatic conditions and emersion behaviour may interact

and cause positive feedback that encourages increasingly terrestrial lifestyles.

### Acknowledgements

We thank the staff of Itza Lodge for logistical support, Michael Wells for analysing emersion videos, Joseph Turko for mathematical assistance and two anonymous reviewers for helpful comments.

### Competing interests

The authors declare no competing or financial interests.

### Author contributions

Conceptualization: A.J.T., S.C., R.L.E., D.S.T., P.A.W.; Methodology: A.J.T., A.T., S.C., R.L.E., P.A.W.; Formal analysis: A.J.T., A.T.; Investigation: A.J.T., A.T., S.C., R.L.E., A.P., D.S.T., P.A.W.; Resources: A.T., S.C., R.L.E., D.S.T., P.A.W.; Data curation: A.T.; Writing - original draft: A.J.T.; Writing - review & editing: A.J.T., A.T., S.C., R.L.E., A.P., D.S.T., P.A.W.; Visualization: A.J.T., A.T.; Supervision: P.A.W.; Project administration: S.C., R.L.E., D.S.T., P.A.W.; Funding acquisition: S.C., R.L.E., P.A.W.

### Funding

Funding was provided by a Natural Sciences and Engineering Research Council of Canada (NSERC) graduate scholarship to A.J.T. and NSERC Discovery Grants to P.A.W. and S.C.

### Supplementary information

Supplementary information available online at <http://jeb.biologists.org/lookup/doi/10.1242/jeb.168039.supplemental>

### References

- Abel, D. C., Koenig, C. C. and Davis, W. P. (1987). Emersion in the mangrove forest fish *Rivulus marmoratus*: a unique response to hydrogen sulfide. *Environ. Biol. Fishes* **18**, 67–72.
- Avise, J. C. and Tatarenkov, A. (2012). Allard's argument versus Baker's contention for the adaptive significance of selfing in a hermaphroditic fish. *Proc. Natl. Acad. Sci. USA* **109**, 18862–18867.
- Avise, J. C. and Tatarenkov, A. (2015). Population genetics and evolution of the mangrove rivulus *Kryptolebias marmoratus*, the world's only self-fertilizing hermaphroditic vertebrate. *J. Fish Biol.* **87**, 519–538.
- Baker, H. G. (1955). Self-compatibility and establishment after "long-distance" dispersal. *Evolution* **9**, 347–349.
- Biro, P. A. and Stamps, J. A. (2010). Do consistent individual differences in metabolic rate promote consistent individual differences in behavior? *Trends Ecol. Evol.* **25**, 653–659.
- Blank, T. and Burggren, W. (2014). Hypoxia-induced developmental plasticity of the gills and air-breathing organ of *Trichopodus trichopterus*. *J. Fish Biol.* **84**, 808–826.
- Blewett, T. A., Simon, R. A., Turko, A. J. and Wright, P. A. (2017). Copper alters hypoxia sensitivity and the behavioural emersion response in the amphibious fish *Kryptolebias marmoratus*. *Aquat. Toxicol.* **189**, 25–30.
- Boldsen, M. M., Norin, T. and Malte, H. (2013). Temporal repeatability of metabolic rate and the effect of organ mass and enzyme activity on metabolism in European eel (*Anguilla anguilla*). *Comp. Biochem. Physiol. A* **165**, 22–29.
- Booth, J. H. (1978). The distribution of blood flow in the gills of fish: application of a new technique to rainbow trout (*Salmo gairdneri*). *J. Exp. Biol.* **73**, 119–129.
- Bowcock, A. M., Ruiz-Linares, A., Tomfohrde, J., Minch, E., Kidd, J. R. and Cavalli-Sforza, L. L. (1994). High resolution of human evolutionary trees with polymorphic microsatellites. *Nature* **368**, 455–457.
- Brunt, E. M., Turko, A. J., Scott, G. R. and Wright, P. A. (2016). Amphibious fish jump better on land after acclimation to a terrestrial environment. *J. Exp. Biol.* **219**, 3204–3207.
- Chapman, L. J. and McKenzie, D. J. (2009). Behavioural responses and ecological consequences. In *Fish Physiology Vol 27: Hypoxia* (ed. J. G. Richards, A. P. Farrell and C. J. Brauner), pp. 26–79. San Diego, CA: Elsevier.
- Chapman, L., Albert, J. and Galis, F. (2008). Developmental plasticity, genetic differentiation, and hypoxia-induced trade-offs in an African cichlid fish. *Open Evol. J.* **2**, 75–88.
- Chapman, J. R., Nakagawa, S., Coltman, D. W., Slate, J. and Sheldon, B. C. (2009). A quantitative review of heterozygosity–fitness correlations in animal populations. *Mol. Ecol.* **18**, 2746–2765.
- Cooper, C. A., Litwiller, S. L., Murrant, C. L. and Wright, P. A. (2012). Cutaneous vasoregulation during short- and long-term aerial acclimation in the amphibious mangrove rivulus, *Kryptolebias marmoratus*. *Comp. Biochem. Physiol. B* **161**, 268–274.
- Crispo, E. and Chapman, L. J. (2008). Population genetic structure across dissolved oxygen regimes in an African cichlid fish. *Mol. Ecol.* **17**, 2134–2148.



- Davis, W. P., Taylor, D. S. and Turner, B. J. (2003). Relevance of mangrove rivulus biology to ecological and laboratory studies: an encapsulated summary. *Proc. 9th Symp. Nat. Hist. Bahamas*, 91-93.
- Dhillon, R. S., Yao, L., Matey, V., Chen, B.-J., Zhang, A.-J., Cao, Z.-D., Fu, S.-J., Brauner, C. J., Wang, Y. S. and Richards, J. G. (2013). Interspecific differences in hypoxia-induced gill remodeling in carp. *Physiol. Biochem. Zool.* **86**, 727-739.
- Diaz, R. J. and Rosenberg, R. (2008). Spreading dead zones and consequences for marine ecosystems. *Science* **321**, 926-929.
- Dieringer, D. and Schlötterer, C. (2003). Microsatellite analyser (MSA): a platform independent analysis tool for large microsatellite data sets. *Mol. Ecol. Notes* **3**, 167-169.
- Dolgin, E. S., Charlesworth, B., Baird, S. E. and Cutter, A. D. (2007). Inbreeding and outbreeding depression in *Caenorhabditis* nematodes. *Evolution* **61**, 1339-1352.
- Elison, A., Cable, J. and Consuegra, S. (2011). Best of both worlds? Association between outcrossing and parasite loads in a selfing fish. *Evolution* **65**, 3021-3026.
- Elison, A., Allainguillaume, J., Girdwood, S., Pachebat, J., Peat, K. M., Wright, P. and Consuegra, S. (2012). Maintaining functional major histocompatibility complex diversity under inbreeding: the case of a selfing vertebrate. *Proc. R. Soc. B* **279**, 5004-5013.
- Felsenstein, J. (1993). *PHYLIP (Phylogeny Inference Package) version 3.5c*. Seattle: Department of Genetics, University of Washington.
- Gimond, C., Jovelin, R., Han, S., Ferrari, C., Cutter, A. D. and Braendle, C. (2013). Outbreeding depression with low genetic variation in selfing *Caenorhabditis* nematodes. *Evolution* **67**, 3087-3101.
- Gracey, A. Y., Troll, J. V. and Somero, G. N. (2001). Hypoxia-induced gene expression profiling in the euryoxic fish *Gillichthys mirabilis*. *Proc. Natl. Acad. Sci. USA* **98**, 1993-1998.
- Graham, J. B. (1997). *Air-Breathing Fishes: Evolution, Diversity and Adaptation*. San Diego, CA: Academic Press.
- Graham, J. B. and Lee, H. J. (2004). Breathing air in air: in what ways might extant amphibious fish biology relate to prevailing concepts about early tetrapods, the evolution of vertebrate air breathing, and the vertebrate land transition? *Physiol. Biochem. Zool.* **77**, 720-731.
- Grizzle, J. M. and Thiyagarajah, A. (1987). Skin histology of *Rivulus ocellatus marmoratus*: apparent adaptation for aerial respiration. *Copeia* **1987**, 237-240.
- Harrington, R. W. Jr. (1961). Oviparous hermaphroditic fish with internal self-fertilization. *Science* **134**, 1749-1750.
- Joyner, M. J. (2013). Physiology and redundancy. *Physiology* **28**, 136-137.
- Kramer, D. L. and McClure, M. (1982). Aquatic surface respiration, a widespread adaptation to hypoxia in tropical freshwater fishes. *Environ. Biol. Fish.* **7**, 47-55.
- LeBlanc, D. M., Wood, C. M., Fudge, D. S. and Wright, P. A. (2010). A fish out of water: gill and skin remodeling promotes osmo- and ionoregulation in the mangrove killifish *Kryptolebias marmoratus*. *Physiol. Biochem. Zool.* **83**, 932-949.
- Lin, H.-C. and Dunson, W. A. (1995). An explanation of the high strain diversity of a self-fertilizing hermaphroditic fish. *Ecology* **76**, 593-605.
- Lins, L. S. F., Trojahn, S., Sockell, A., Yee, M.-C., Tatarenkov, A., Bustamante, C. D., Earley, R. L. and Kelley, J. L. (2018). Whole-genome sequencing reveals the extent of heterozygosity in a preferentially self-fertilizing hermaphroditic vertebrate. *Genome* **61**, 241-247.
- Losos, J. B. (2011). Convergence, adaptation, and constraint. *Evolution* **65**, 1827-1840.
- Low, W. P., Lane, D. J. W. and Ip, Y. K. (1988). A comparative study of terrestrial adaptations of the gills in three mudskippers: *Periophthalmus chrysospilos*, *Boleophthalmus boddarti*, and *Periophthalmodon schlosseri*. *Biol. Bull.* **175**, 434-438.
- Mackiewicz, M., Tatarenkov, A., Taylor, D. S., Turner, B. J. and Avise, J. C. (2006a). Extensive outcrossing and androdioecy in a vertebrate species that otherwise reproduces as a self-fertilizing hermaphrodite. *Proc. Natl. Acad. Sci. USA* **103**, 9924-9928.
- Mackiewicz, M., Tatarenkov, A., Perry, A., Martin, J. R., Elder, J. F., Bechler, D. L. and Avise, J. C. (2006b). Microsatellite documentation of male-mediated outcrossing between inbred laboratory strains of the self-fertilizing mangrove killifish (*Kryptolebias marmoratus*). *J. Hered.* **97**, 508-513.
- Mandic, M., Sloman, K. A. and Richards, J. G. (2009a). Escaping to the surface: a phylogenetically independent analysis of hypoxia-induced respiratory behaviors in sculpins. *Physiol. Biochem. Zool.* **82**, 730-738.
- Mandic, M., Todgham, A. E. and Richards, J. G. (2009b). Mechanisms and evolution of hypoxia tolerance in fish. *Proc. R. Soc. B* **276**, 735-744.
- Mandic, M., Ramon, M. L., Gracey, A. Y. and Richards, J. G. (2014). Divergent transcriptional patterns are related to differences in hypoxia tolerance between the intertidal and the subtidal sculpins. *Mol. Ecol.* **23**, 6091-6103.
- Marshall, D. J., Bode, M. and White, C. R. (2013). Estimating physiological tolerances – a comparison of traditional approaches to nonlinear regression techniques. *J. Exp. Biol.* **216**, 2176-2182.
- McBryan, T. L., Healy, T. M., Haakons, K. L. and Schulte, P. M. (2016). Warm acclimation improves hypoxia tolerance in *Fundulus heteroclitus*. *J. Exp. Biol.* **219**, 474-484.
- Mueller, C. A. and Seymour, R. S. (2011). The regulation index: a new method for assessing the relationship between oxygen consumption and environmental oxygen. *Physiol. Biochem. Zool.* **84**, 522-532.
- Munshi, J. S. D. (1976). Gross and fine structure of the respiratory organs of air-breathing fishes. In *Respiration of Amphibious Vertebrates* (ed. G. M. Hughes), pp. 73-104. London: Academic Press.
- Nilsson, G. E. (2007). Gill remodeling in fish - a new fashion or an ancient secret? *J. Exp. Biol.* **210**, 2403-2409.
- Nilsson, G. E., Dymowska, A. and Stecyk, J. A. W. (2012). New insights into the plasticity of gill structure. *Respir. Physiol. Neurobiol.* **184**, 214-222.
- Ong, K. J., Stevens, E. D. and Wright, P. A. (2007). Gill morphology of the mangrove killifish (*Kryptolebias marmoratus*) is plastic and changes in response to terrestrial air exposure. *J. Exp. Biol.* **210**, 1109-1115.
- Pannell, J. R. and Barrett, S. C. H. (1998). Baker's law revisited: reproductive assurance in a metapopulation. *Evolution* **52**, 657-668.
- Perry, S. F. and Gilmour, K. M. (2002). Sensing and transfer of respiratory gases at the fish gill. *J. Exp. Zool. A* **293**, 249-263.
- Perry, S. F. and Gilmour, K. M. (2010). Oxygen uptake and transport in water breathers. In *Respiratory Physiology of Vertebrates: Life With and Without Oxygen* (ed. G. E. Nilsson), pp. 49-94. Cambridge, UK: Cambridge University Press.
- Reed, D. H. and Frankham, R. (2003). Correlation between fitness and genetic diversity. *Conserv. Biol.* **17**, 230-237.
- Regan, K. S., Jonz, M. G. and Wright, P. A. (2011). Neuroepithelial cells and the hypoxia emersion response in the amphibious fish *Kryptolebias marmoratus*. *J. Exp. Biol.* **214**, 2560-2568.
- Richards, J. G. (2009). Metabolic and molecular responses of fish to hypoxia. In *Fish Physiology Vol 27: Hypoxia* (ed. J. G. Richards, A. P. Farrell and C. J. Brauner), pp. 444-487. San Diego, CA: Elsevier.
- Richards, J. G., Farrell, A. P. and Brauner, C. J. (2009). *Fish Physiology Vol 27: Hypoxia*. San Diego, CA: Elsevier.
- Robertson, C. E., Turko, A. J., Jonz, M. G. and Wright, P. A. (2015). Hypercapnia and low pH induce neuroepithelial cell proliferation and emersion behaviour in the amphibious fish *Kryptolebias marmoratus*. *J. Exp. Biol.* **218**, 2987-2990.
- Rodela, T. M. and Wright, P. A. (2006). Metabolic and neuroendocrine effects on diurnal urea excretion in the mangrove killifish *Rivulus marmoratus*. *J. Exp. Biol.* **209**, 2704-2712.
- Samollow, P. B. and Soulé, M. E. (1983). A case of stress related heterozygote superiority in nature. *Evolution* **37**, 646-649.
- Shikano, T. and Taniguchi, N. (2002). Heterosis for neonatal survival in the guppy. *J. Fish Biol.* **60**, 715-725.
- Shull, G. H. (1948). What is "heterosis"? *Genetics* **33**, 439-446.
- Sollid, J. and Nilsson, G. E. (2006). Plasticity of respiratory structures - adaptive remodeling of fish gills induced by ambient oxygen and temperature. *Resp. Physiol. Neurobiol.* **154**, 241-251.
- Sollid, J., De Angelis, P., Gundersen, K. and Nilsson, G. E. (2003). Hypoxia induces adaptive and reversible gross morphological changes in crucian carp gills. *J. Exp. Biol.* **206**, 3667-3673.
- Stearns, S. C. (1987). *The Evolution of Sex and its Consequences*. Basel: Birkhaeuser Verlag.
- Stern, D. L. and Orgogozo, V. (2009). Is genetic evolution predictable? *Science* **323**, 746-751.
- Sturla, M., Paola, P., Carlo, G., Angela, M. M. and Maria, U. B. (2002). Effects of induced aestivation in *Protopterus annectens*: a histomorphological study. *J. Exp. Zool.* **292**, 26-31.
- Tatarenkov, A., Lima, S. M. Q., Taylor, D. S. and Avise, J. C. (2009). Long-term retention of self-fertilization in a fish clade. *Proc. Natl. Acad. Sci. USA* **106**, 14456-14459.
- Tatarenkov, A., Ring, B. C., Elder, J. F., Bechler, D. L. and Avise, J. C. (2010). Genetic composition of laboratory stocks of the self-fertilizing fish *Kryptolebias marmoratus*: a valuable resource for experimental research. *PLoS ONE* **5**, e12863.
- Tatarenkov, A., Earley, R. L., Taylor, D. S. and Avise, J. C. (2012). Microevolutionary distribution of isogenicity in a self-fertilizing fish (*Kryptolebias marmoratus*) in the Florida Keys. *Integr. Comp. Biol.* **52**, 743-752.
- Tatarenkov, A., Earley, R. L., Perlman, B. M., Taylor, D. S., Turner, B. J. and Avise, J. C. (2015). Genetic subdivision and variation in selfing rates among Central American populations of the mangrove rivulus, *Kryptolebias marmoratus*. *J. Hered.* **106**, 276-284.
- Tatarenkov, A., Lima, S. M. Q., Earley, R. L., Berbel-Filho, W. M., Vermeulen, F. B. M., Taylor, D. S., Marson, K., Turner, B. J. and Avise, J. C. (2017). Deep and concordant subdivisions in the self-fertilizing mangrove killifishes (*Kryptolebias*) revealed by nuclear and mtDNA markers. *Biol. J. Linn. Soc.* **122**, 558-578.
- Taylor, D. S. (1990). Adaptive specializations of the cyprinodont fish *Rivulus marmoratus*. *Fl. Sci.* **53**, 239-248.
- Taylor, D. S. (2001). Physical variability and fluctuating asymmetry in heterozygous and homozygous populations of *Rivulus marmoratus*. *Can. J. Zool.* **79**, 766-778.
- Taylor, D. S. (2012). Twenty-four years in the mud: what have we learned about the natural history and ecology of the mangrove rivulus, *Kryptolebias marmoratus*? *Integr. Comp. Biol.* **52**, 724-736.
- Timmerman, C. M. and Chapman, L. J. (2004). Hypoxia and interdemographic variation in *Poecilia latipinna*. *J. Fish Biol.* **65**, 635-650.

- Ton, C., Stamatiou, D. and Liew, C.-C.** (2003). Gene expression profile of zebrafish exposed to hypoxia during development. *Physiol. Genomics* **13**, 97-106.
- Turko, A. J. and Wright, P. A.** (2015). Evolution, ecology and physiology of amphibious killifishes (Cyprinodontiformes). *J. Fish Biol.* **87**, 815-835.
- Turko, A. J., Earley, R. L. and Wright, P. A.** (2011). Behaviour drives morphology: voluntary emersion patterns shape gill structure in genetically identical mangrove rivulus. *Anim. Behav.* **82**, 39-47.
- Turko, A. J., Cooper, C. A. and Wright, P. A.** (2012). Gill remodelling during terrestrial acclimation reduces aquatic respiratory function of the amphibious fish *Kryptolebias marmoratus*. *J. Exp. Biol.* **215**, 3973-3980.
- Turko, A. J., Robertson, C. E., Bianchini, K., Freeman, M. and Wright, P. A.** (2014). The amphibious fish *Kryptolebias marmoratus* uses different strategies to maintain oxygen delivery during aquatic hypoxia and air exposure. *J. Exp. Biol.* **217**, 3988-3995.
- Turko, A. J., Kültz, D., Fudge, D., Croll, R. P., Smith, F. M., Stoyek, M. R. and Wright, P. A.** (2017). Skeletal stiffening in an amphibious fish out of water is a response to increased body weight. *J. Exp. Biol.* **220**, 3621-3631.
- Turner, B. J., Fisher, M. T., Taylor, D. S., Davis, W. P. and Jarrett, B. L.** (2006). Evolution of 'maleness' and outcrossing in a population of the self-fertilizing killifish, *Kryptolebias marmoratus*. *Evol. Ecol. Res.* **8**, 1475-1486.
- Tzaneva, V., Gilmour, K. M. and Perry, S. F.** (2011). Respiratory responses to hypoxia or hypercapnia in goldfish (*Carassius auratus*) experiencing gill remodelling. *Respir. Physiol. Neurobiol.* **175**, 112-120.
- Tzaneva, V., Vadeboncoeur, C., Ting, J. and Perry, S. F.** (2014). Effects of hypoxia-induced gill remodelling on the innervation and distribution of ionocytes in the gill of goldfish, *Carassius auratus*. *J. Comp. Neurol.* **522**, 118-130.
- Urbina, M. A., Forster, M. E. and Glover, C. N.** (2011). Leap of faith: voluntary emersion behaviour and physiological adaptations to aerial exposure in a non-aestivating freshwater fish in response to aquatic hypoxia. *Physiol. Behav.* **103**, 240-247.
- van der Meer, D. L. M., van den Thillart, G. E. E. J. M., Witte, F., de Bakker, M. A. G., Besser, J., Richardson, M. K., Spaink, H. P., Leito, J. T. D. and Bagowski, C. P.** (2005). Gene expression profiling of the long-term adaptive response to hypoxia in the gills of adult zebrafish. *Am. J. Physiol. Regul. Integr. Comp. Physiol.* **289**, 1512-1519.
- Wagner, A.** (2005). Distributed robustness versus redundancy as causes of mutational robustness. *BioEssays* **27**, 176-188.
- Wright, P. A.** (2012). Environmental physiology of the mangrove rivulus, *Kryptolebias marmoratus*, a cutaneously breathing fish that survives for weeks out of water. *Integr. Comp. Biol.* **52**, 792-800.
- Wright, P. A. and Turko, A. J.** (2016). Amphibious fishes: evolution and phenotypic plasticity. *J. Exp. Biol.* **219**, 2245-2259.
- Yeager, D. P. and Ultsch, G. R.** (1989). Physiological regulation and conformation: a BASIC program for the determination of critical points. *Physiol. Zool.* **62**, 888-907.
